# Supplementary material
Source: Springer Nature journal article supplement (https://www.springermedizin.de/resource/supplementary/13054_2013_3012_MOESM1_ESM.pdf/9712396)
Supplement: MOESM1 [file 9712396]

|                  | 0h         | 1h         | 2h            | 3h               | 4h                | 6h         | p <sup>#</sup> |
|------------------|------------|------------|---------------|------------------|-------------------|------------|----------------|
| <b>Malaise</b>   | 2<br>(1-3) | 2<br>(1-2) | 3<br>(2-3)    | 5****<br>(3-5)   | 5****<br>(4-5)    | 1<br>(1-2) | <0.0001        |
| <b>Shivering</b> | 1<br>(1-1) | 1<br>(1-1) | 2<br>(1-2)    | 6****<br>(3-6)   | 4***<br>(3-6)     | 1<br>(1-1) | <0.0001        |
| <b>Nausea</b>    | 1<br>(1-1) | 1<br>(1-1) | 1<br>(1-1)    | 1<br>(1-2)       | 2<br>(1-2)        | 1<br>(1-2) | 0.1002         |
| <b>Headache</b>  | 1<br>(1-1) | 2<br>(1-2) | 2*<br>(2-4)   | 3**<br>(2-5)     | 4****<br>(2-6)    | 1<br>(1-1) | <0.0001        |
| <b>Myalgia</b>   | 1<br>(1-1) | 1<br>(1-2) | 2<br>(1-2)    | 2**<br>(1-3)     | 2**<br>(2-3)      | 1<br>(1-1) | 0.0008         |
| <b>Dizziness</b> | 1<br>(1-2) | 1<br>(1-2) | 2<br>(1-3)    | 2<br>(1-4)       | 2<br>(1-4)        | 1<br>(1-2) | 0.0054         |
| <b>Total</b>     | 8<br>(6-9) | 9<br>(8-9) | 12<br>(10-15) | 17***<br>(14-23) | 19****<br>(15-22) | 7<br>(6-8) | <0.0001        |

**Additional file 1. Effects of a lipopolysaccharide (LPS) infusion on symptom scores in healthy volunteers (n = 10).** LPS was administered as a continuous 4-hour intravenous infusion from 0 to 4h at an infusion rate of 0.5 ng kg<sup>-1</sup> hour<sup>-1</sup>. Volunteer symptoms were evaluated at these time points by means of a modified visual analogue scale, in which each symptom was rated from 1 (implying that the symptom was not present at all) to 10 (implying that the symptom was the worst imaginable). Individual symptom scores were added together to yield a total symptom score with a minimal value of 6 and a maximal value of 60. Data are presented as median (IQR). # p-value for LPS x time interaction (linear mixed model); different from baseline (after Tukey-Kramer adjustment for multiple comparisons), \* p < 0.05, \*\* p < 0.01, \*\*\* p < 0.001, and \*\*\*\* p < 0.0001.
